# Supplementary material for: Complement-mediated enhancement of SARS-CoV-2 antibody neutralisation potency in vaccinated individuals
Source: Springer Nature journal article supplement (doi:10.1038/s41467-025-57947-8), 2025-03-18
Supplement: MOESM1 [file 41467_2025_57947_MOESM1_ESM.pdf]

## **Supplementary Information**

# **Complement-Mediated Enhancement of SARS-CoV-2 Antibody Neutralisation Potency in Vaccinated Individuals**

## **Authors**

Jack Mellors<sup>1\*</sup>, Raman Dhaliwal<sup>2</sup>, Stephanie Longet<sup>3</sup>, Tom Tipton<sup>1</sup>, OCTAVE Consortium<sup>4\*\*\*</sup>, OPTIC Consortium<sup>4\*\*\*</sup>, Eleanor Barnes<sup>4,5</sup>, Susanna J Dunachie<sup>4,6</sup>, Paul Klenerman<sup>4,5</sup>, Julian Hiscox<sup>7</sup>, Miles Carroll<sup>1\*\*</sup>

## **Corresponding Authors**

\*Jack Mellors

[jmellors@ic.ac.uk](mailto:jmellors@ic.ac.uk)

\*\*Miles Carroll

[miles.carroll@ndm.ox.ac.uk](mailto:miles.carroll@ndm.ox.ac.uk)

## **Affiliations**

<sup>1</sup> Centre for Human Genetics and the Pandemic Sciences Institute, Nuffield Department of Medicine, University of Oxford, Oxford, United Kingdom.

<sup>2</sup> Sir William Dunn School of Pathology, University of Oxford, Oxford, United Kingdom

<sup>3</sup> Centre International de Recherche en Infectiologie, Université Jean Monnet, Université Claude Bernard Lyon, Inserm, Saint-Etienne, France

<sup>4</sup> NIHR Oxford Biomedical Research Centre, Oxford University Hospitals NHS Foundation Trust, Oxford, United Kingdom

<sup>5</sup> Translational Gastroenterology and Liver Unit, Nuffield Department of Medicine, University of Oxford, Oxford, United Kingdom

<sup>6</sup> NDM Centre for Global Health Research, Nuffield Department of Medicine, University of Oxford, Oxford, United Kingdom

<sup>7</sup> Department of Infection Biology and Microbiomes, Institute of Infection, Veterinary and Ecological Sciences, University of Liverpool, Liverpool, United Kingdom

\*\*\* A list of authors and their affiliations appears at the end of the main paper

**Supplementary Figure 1:** Gating strategy example for the IgG subclass assays, using OPTIC sample 4 at a 1:50 dilution for the detection of IgG2 and IgG4. Assay measures IgG1-4 binding to APC-fluorescent beads conjugated to the SARS-CoV-2 spike protein. **a** Gating of SARS-CoV-2 spike conjugated beads using FSC-A and SSC-A. **b** Gating of bead population using APC fluorescence. **c** IgG2 or **d** IgG4 measured using PE-conjugated secondary antibody. Gating and median fluorescence intensity determined using FlowJo (Version 10.10.0).

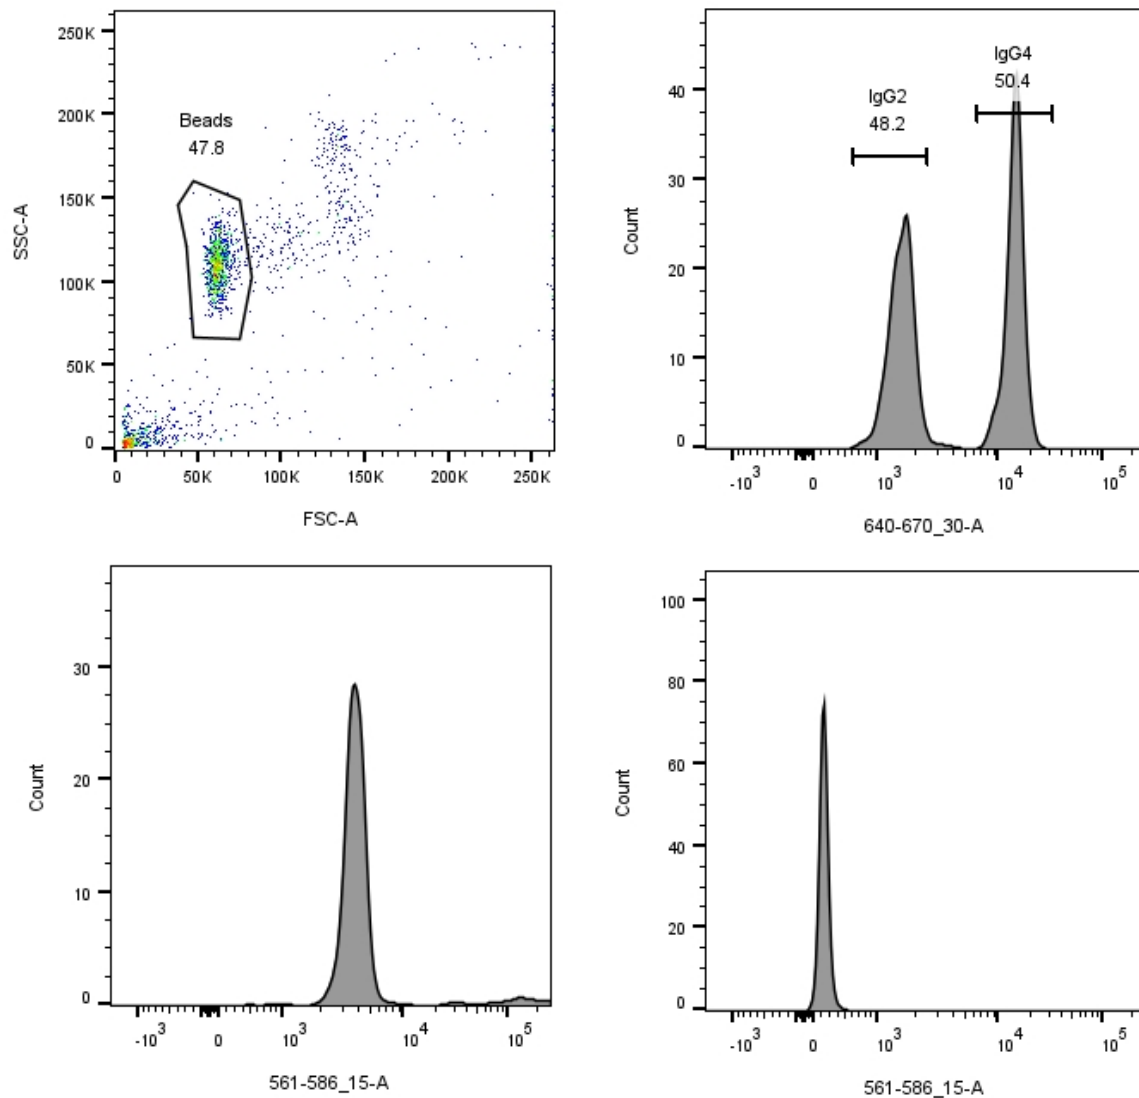

**Supplementary Figure 2:** Gating strategy example for antibody dependent complement deposition assays using serum from OPTIC sample 1 at a 1:50 dilution and 20% IgG/IgM-depleted complement. Assay measures C3c deposition in response to APC-fluorescent beads conjugated with the SARS-CoV-2 spike protein. **a** Gating of SARS-CoV-2 spike conjugated beads using FSC-A and SSC-A. **b** Gating of bead population using APC fluorescence. **c** Measurement of C3c deposition using FITC-conjugated antibody. Gating and median fluorescence intensity determined using FlowJo (Version 10.10.0).

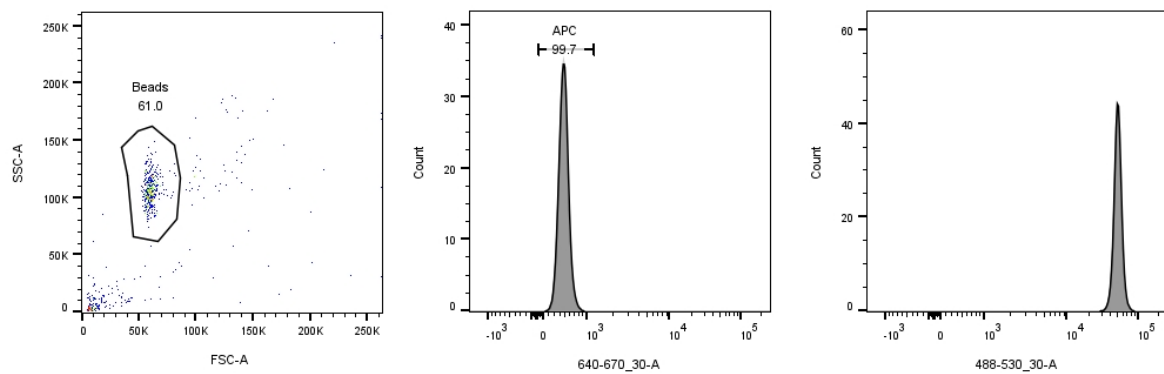

**Supplementary Figure 3:** Comparison of raw foci numbers as a measure of SARS-CoV-2 infection for microneutralisation assay controls in the absence of OPTIC immune sera. The addition of pooled human plasma (PHP) or heat-inactivated (HI)-FCS did not significantly reduce the level of infection in absence of immune sera. In some conditions, the level of infection was significantly higher than the conditions supplemented with media-only. Each spot indicates a single replicate from a total of 8 replicates per plate, with all plates tested. Significance with  $p < 0.05$  was determined by Kruskal-Wallis test with Dunn's multiple comparisons test in GraphPad Prism (version 10). Exact  $p$  values for Vero E6/VIC01 (Media Vs HI-FCS,  $p = < 0.0001$ ; Media Vs PHP,  $p = < 0.0001$ ), Vero E6/BA.1 (Media Vs PHP,  $p = < 0.0001$ , HI-FCS Vs PHP,  $p = < 0.0001$ ), Calu-3/VIC01 (Media Vs HI-FCS,  $p = 0.0049$ ), Calu-3/BA.1 (Media Vs HI-FCS,  $p = < 0.0001$ ; Media Vs PHP,  $p = < 0.0001$ ; HI-FCS Vs PHP,  $p = 0.0020$ ). \*  $p < 0.05$ , \*\*  $p < 0.01$ , \*\*\*  $p < 0.001$ , \*\*\*\*  $p < 0.0001$ . Source data are provided as a Source Data file.

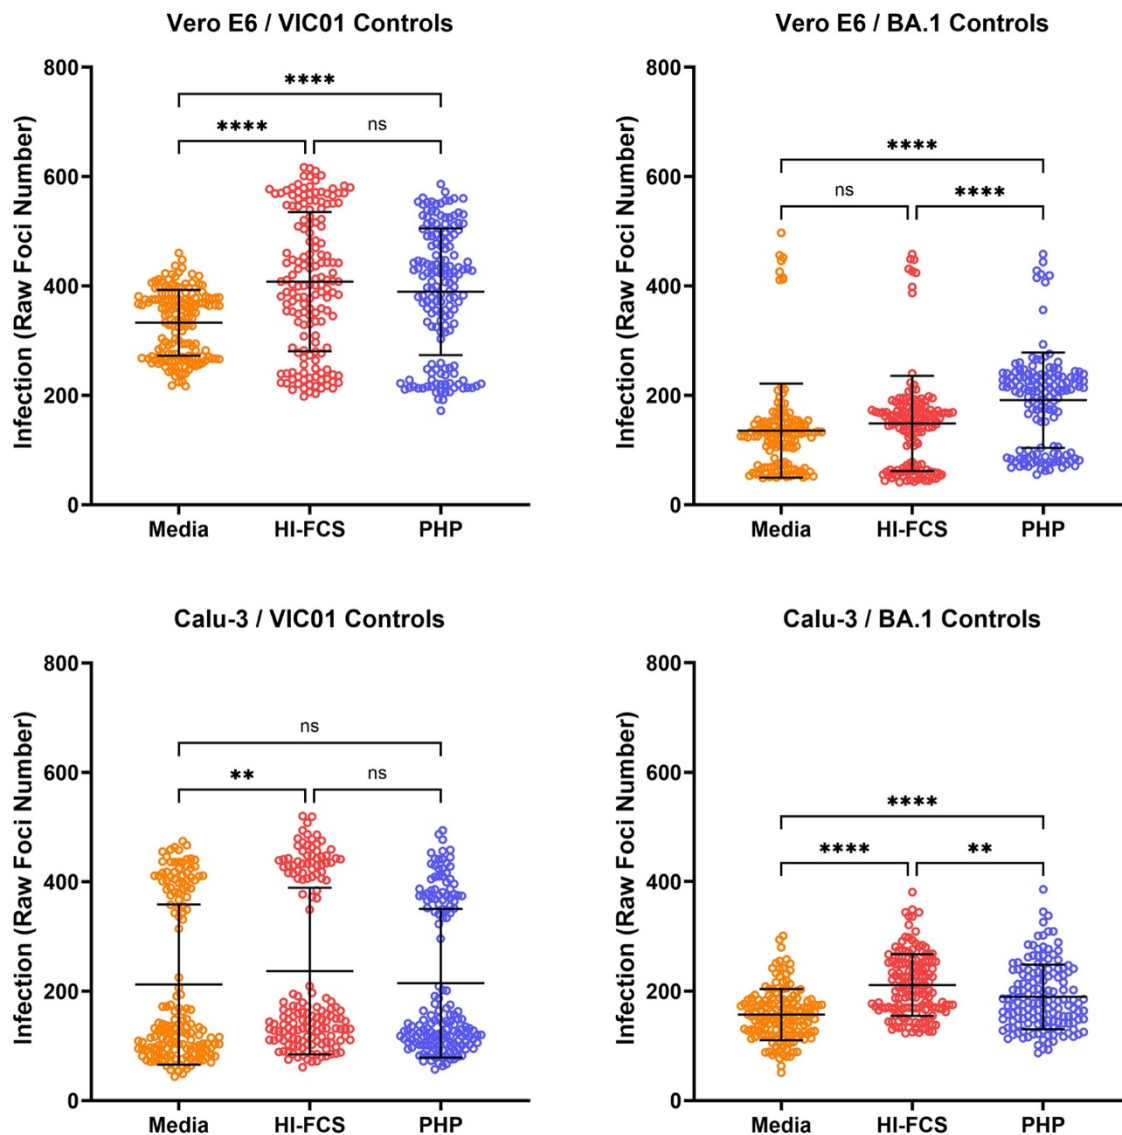

**Supplementary Figure 4:** Crystal violet staining of complement-only conditions to measure cytotoxicity. **(a)** Cytotoxicity test using Calu-3 cells with media only, 20% pooled human plasma (PHP), 20% C3/C5 depleted plasma, or 1.8% DMSO as a positive control. Tearing from manual pipetting was evident in some conditions and cytotoxicity was evident only in the 1.8% DMSO condition. **(b)** Cytotoxicity test using Vero E6 cells with media only, 20% PHP, or 3% DMSO as a positive control. Conditions replicated the microneutralisation assay procedure and cells were stained with 0.2% crystal violet in 20% ethanol. Cytotoxicity was only evident in the 3% DMSO condition.

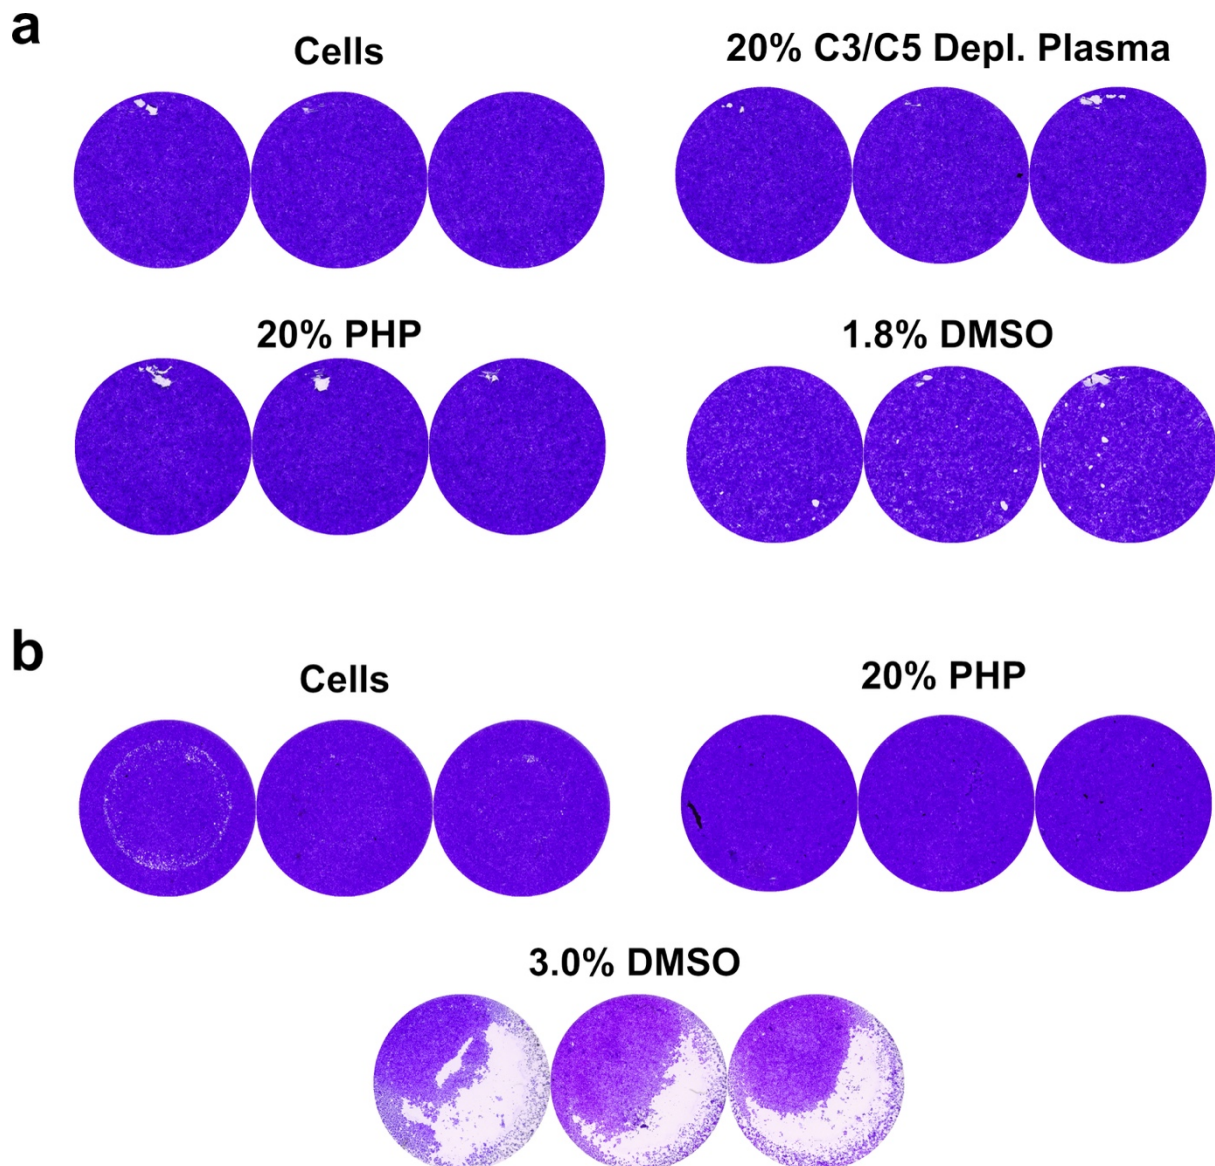

**Supplementary Figure 5:** Transmission electron microscopy images of SARS-CoV-2 in the presence of OPTIC serum sample 10 and pooled human plasma (PHP). No clear difference was observed between the virus-only condition and the addition of immune sera with PHP or heat-inactivated PHP (HI-PHP). The black arrows indicate examples of SARS-CoV-2 particles.

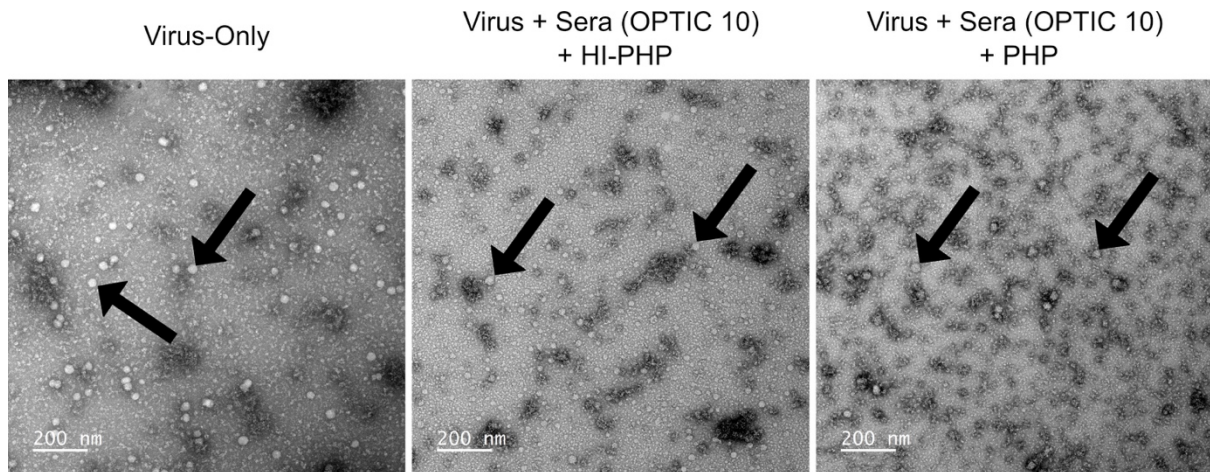



**Supplementary Figure 6:** Pearson correlations comparing IgG binding to Coronavirus spike proteins (determined via Meso Scale Discovery) against neutralisation for the Enhanced Group ( $n = 14$ ) and Non-Enhanced Group ( $n = 17$ ). Corrected for multiple comparisons with Benjamini Hochberg false discovery rate of 0.05 in GraphPad Prism (version 10). \*  $p < 0.05$ , \*\*  $p < 0.01$ , \*\*\*  $p < 0.001$ , \*\*\*\*  $p < 0.0001$ . Nucleocapsid (N); pooled human plasma (PHP); receptor binding domain (RBD); spike (S). Source data are provided as a Source Data file.

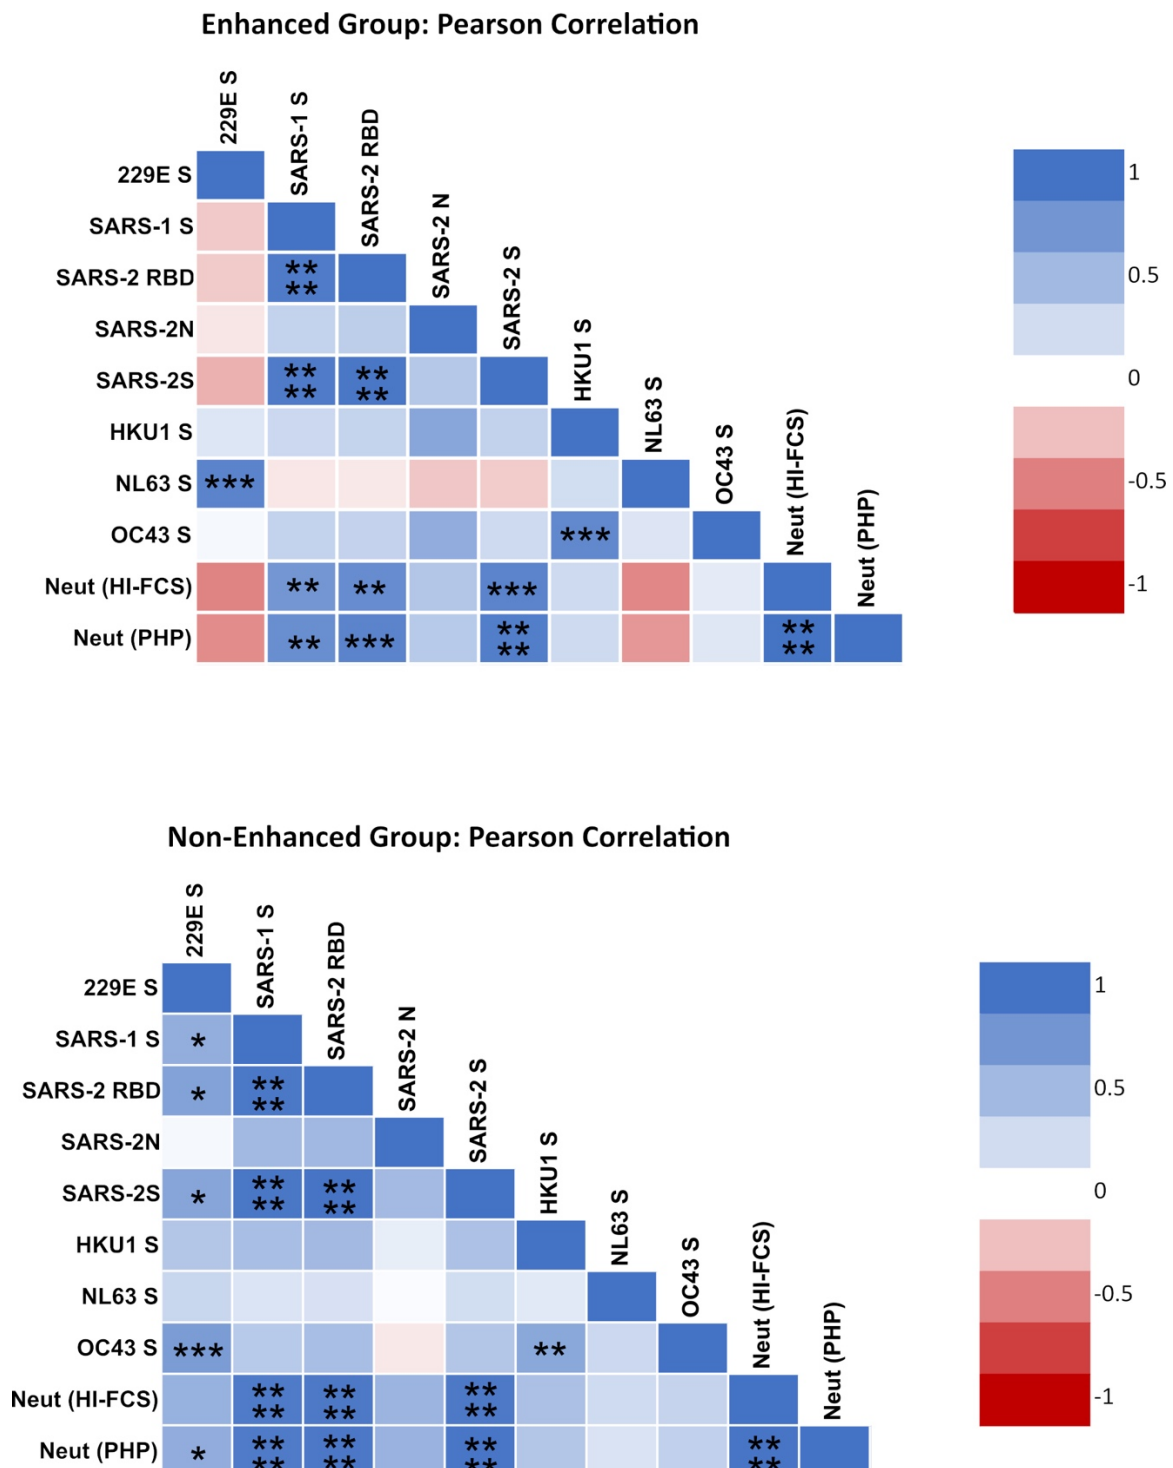

**Supplementary Figure 7:** Mean decrease in accuracy and receiver operating characteristic (ROC) curve for random forest analysis to determine complement-mediated enhancement of neutralisation ( $n = 30$ ). Analysis was performed in R Studio using the 'randomForest' and 'pROC' packages.

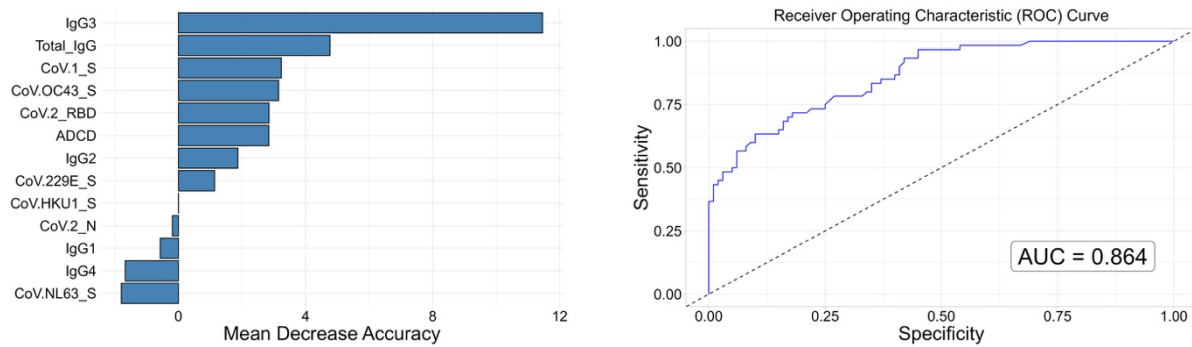



**Supplementary Figure 8:** SARS-CoV-2 neutralisation titres comparing the use of Vero E6 cells with and without TMPRSS2 expression. Normalised neutralisation titres supplemented with heat-inactivated pooled human plasma (PHP) were subtracted from values supplemented with PHP to determine the increase in complement-mediated neutralisation. Error bars show the mean and standard deviation. Results were non-significant ( $p = 0.274$ ) as determined by a paired, two-tailed t test where  $p < 0.05$  is significant. Source data are provided as a Source Data file.

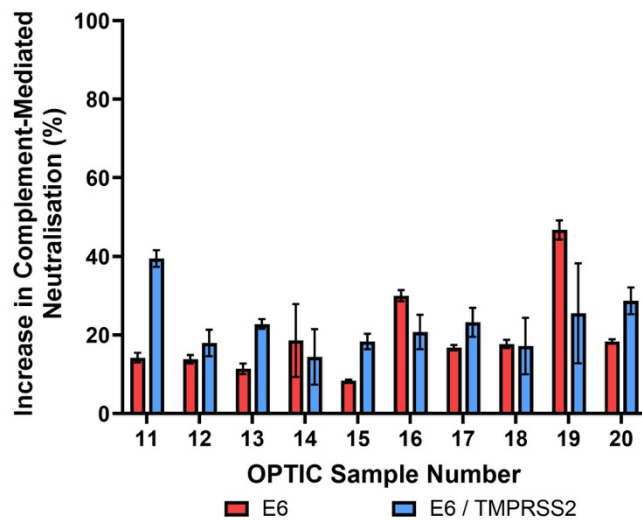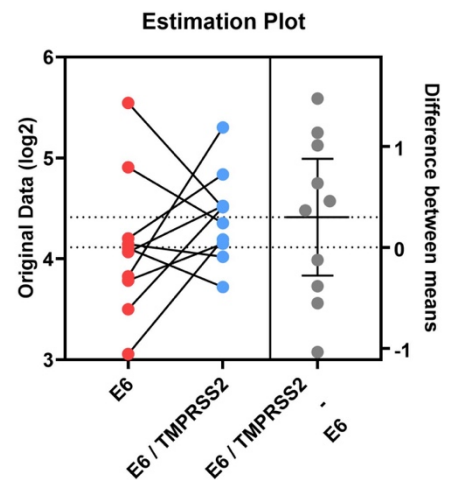

**Supplementary Figure 9:** Correlations with IgM and IgG binding to Coronavirus spike proteins determined via Meso Scale Discovery (MSD) against SARS-CoV-2 (VIC01 strain) neutralisation titres for the OCTAVE ( $n = 21$ ) and OPTIC ( $n = 10$ ) cohorts. Corrected for multiple comparisons using Benjamini Hochberg false discovery rate of 0.05. Statistical analysis was performed in GraphPad Prism (Version 10). \*  $p < 0.05$ , \*\*  $p < 0.01$ , \*\*\*  $p < 0.001$ , \*\*\*\*  $p < 0.0001$ . Nucleocapsid (N); pooled human plasma (PHP); receptor binding domain (RBD); spike (S). Source data are provided as a Source Data file.

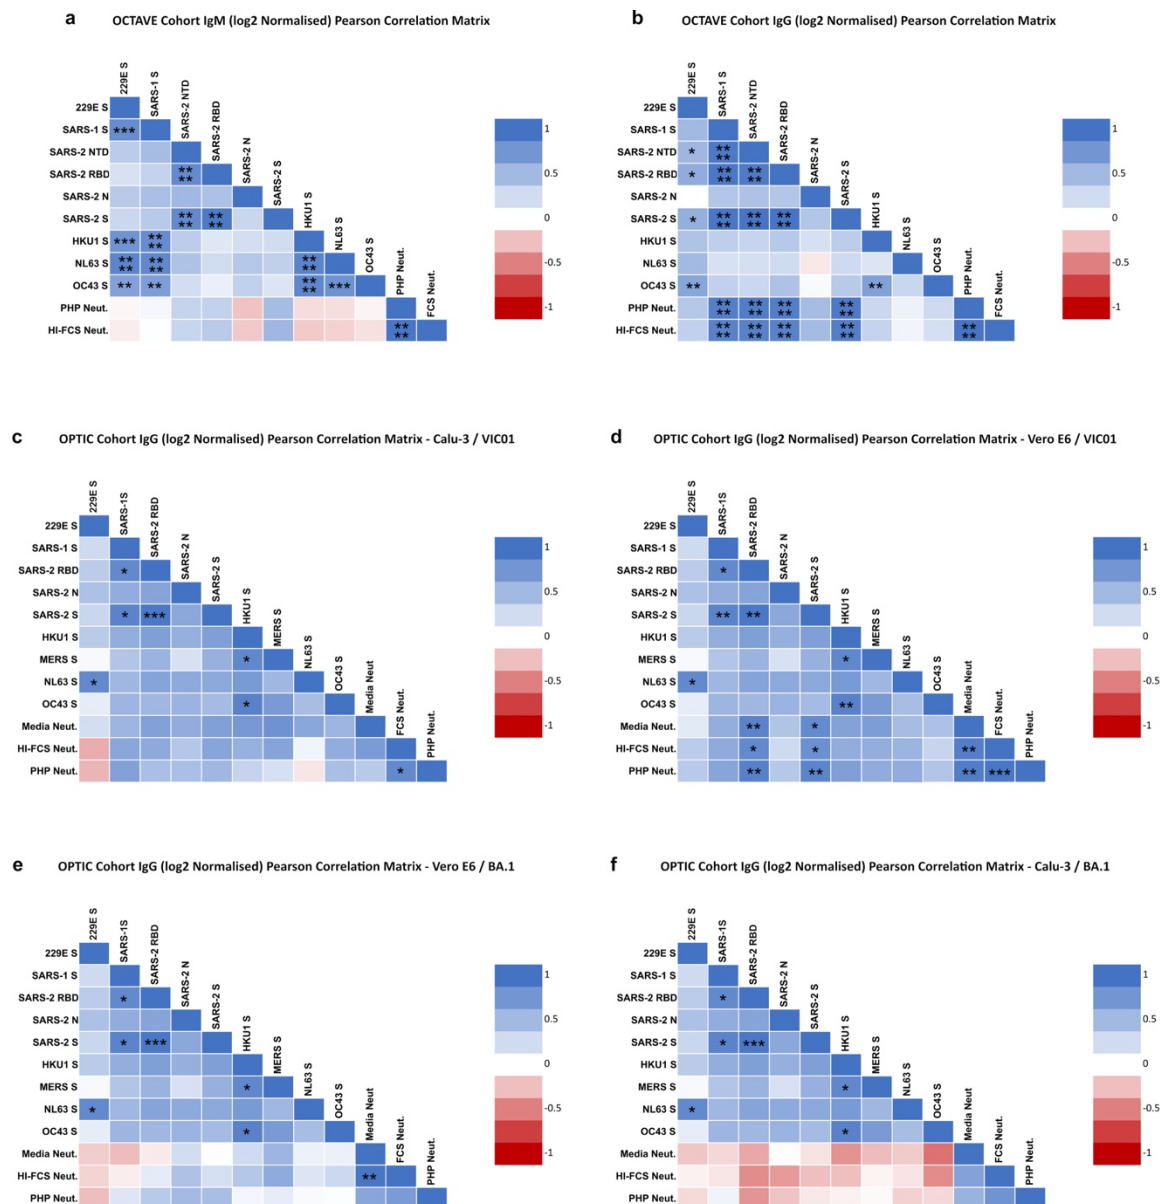

**Supplementary Figure 10:** Comparison of antibody characteristics between the OPTIC and OCTAVE cohorts. **a** Total SARS-CoV-2 spike IgG titres measured via electrochemiluminescence (ECL) (OPTIC,  $n = 10$ ; OCTAVE,  $n = 21$ ). **b** Median fluorescence intensity (MFI) of IgG1-4 in all samples (OPTIC,  $n = 9$ ; OCTAVE,  $n = 21$ ). **c** Pairwise comparison of MFI of IgG1-4 SARS-CoV-2 spike specific titres (OPTIC,  $n = 9$ ; OCTAVE,  $n = 21$ ). **d** Pairwise comparison of antibody-dependent complement deposition (ADCD) between the two cohorts (OPTIC,  $n = 9$ ; OCTAVE,  $n = 21$ ). Statistical significance for **a – d** was determined via an unpaired, two-tailed t test in GraphPad Prism (Version 10). Error bars show the mean value with standard deviation. **e** Pearson correlation with Benjamini Hochberg false discovery rate of 0.05 to compare relationships of antibody characteristics within the two cohorts. \*  $p < 0.05$ , \*\*  $p < 0.01$ , \*\*\*  $p < 0.001$ , \*\*\*\*  $p < 0.0001$ . Source data are provided as a Source Data file.

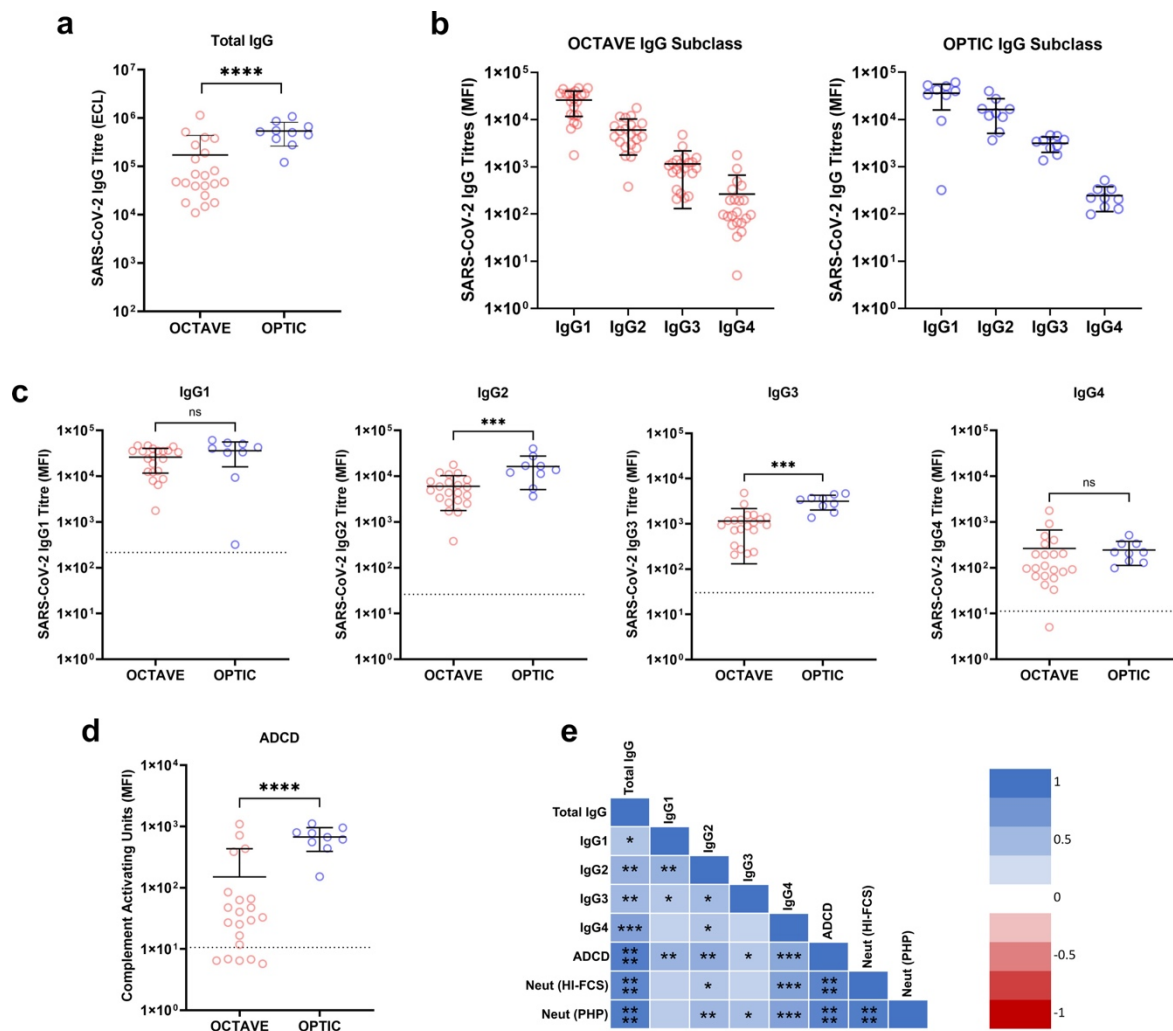

**Supplementary Table 1:** Meso Scale Discovery (MSD) SARS-CoV-2 antigen information for ACE2 competition assays. Information supplied by MSD as reported in the product documentation “V-PLEX COVID-19 ACE2 Neutralization Assays insert”.

| Spot | SARS-CoV-2 Antigen                                                                     | Lineage | Amino Acid Modifications                                                                                                                                                                                                                           |
|------|----------------------------------------------------------------------------------------|---------|----------------------------------------------------------------------------------------------------------------------------------------------------------------------------------------------------------------------------------------------------|
| 1    | Spike (Wuhan)                                                                          | Wuhan   | Not Applicable                                                                                                                                                                                                                                     |
| 2    | Spike (BA.2.12.1)                                                                      | Omicron | T19I, (L24-A27)toS, G142D, V213G, G339D, S371F, S373P, S375F, T376A, D405N, R408S, K417N, N440K, L452Q, S477N, T478K, E484A, Q493R, Q498R, N501Y, Y505H, D614G, H655Y, N679K, P681H, S704LN764K, D796Y, Q954H, N969K                               |
| 3    | Nucleocapsid                                                                           | Wuhan   | Not Applicable                                                                                                                                                                                                                                     |
| 4    | Spike (BA.2.75)                                                                        | Omicron | T19I, L24-A27>S, G142D, K147E, W152R, F157L, I210V, V213G, G257S, G339H, S371F, S373P, S375F, T376A, D405N, R408S, K417N, N440K, G446S, N460K, S477N, T478K, E484A, Q498R, N501Y, Y505H, D614G, H655Y, N679K, P681H, N764K, D796Y, Q954H, N969K    |
| 5    | Spike (BA.2; BA.2.1; BA.2.2; BA.2.3; BA.2.5; BA.2.6; BA.2.7; BA.2.8; BA.2.10; BA.2.12) | Omicron | T19I, (L24-A27)toS, G142D, V213G, G339D, S371F, S373P, S375F, T376A, D405N, R408S, K417N, N440K, S477N, T478K, E484A, Q493R, Q498R, N501Y, Y505H, D614G, H655Y, N679K, P681H, N764K, D796Y, Q954H, N969K                                           |
| 6    | Spike (B.1.1.529; BA.1; BA.1.15)                                                       | Omicron | A67V, ΔH69-V70, T95I, G142D, Δ143-145, Δ211/L212I, ins214EPE, G339D, S371L, S373P, S375F, K417N, N440K, G446S, S477N, T478K, E484A, Q493R, G496S, Q498R, N501Y, Y505H, T547K, D614G, H655Y, N679K, P681H, N764K, D796Y, N856K, Q954H, N969K, L981F |
| 7    | Spike (B.1.617.2; AY.4)                                                                | Delta   | <b>(Alt Seq 2):</b> T19R, T95I, G142D, Δ156/157, R158G, L452R, T478K, D614G, P681R, D950N                                                                                                                                                          |
| 8    | Spike (B.1.1.7)                                                                        | Alpha   | ΔH69-V70, ΔY144, N501Y, A570D, D614G, P681H, T716I, S982A, D1118H                                                                                                                                                                                  |
| 9    | Spike (B.1.351)                                                                        | Beta    | L18F, D80A, D215G, Δ242-244, R246I, K417N, E484K, N501Y, D614G, A701V                                                                                                                                                                              |
| 10   | Spike (BA.5)                                                                           | Omicron | T19I, (L24-A27)toS, del69/70, G142D, V213G, G339D, S371F, S373P, S375F, T376A, D405N, R408S, K417N, N440K, L452R, S477N, T478K, E484A, F486V, Q498R, N501Y, Y505H, D614G, H655Y, N679K, P681H, N764K, D796Y, Q954H, N969K                          |

Note: Alternative S-GENE mutations for Spike of B.1.617.2 is listed as "Alt Seq 2."
